# Supplementary material for: Chicken domestication changes expression of stress-related genes in brain, pituitary and adrenals
Source: PubMed Central journal article supplement (PMC5577413; doi:10.1016/j.ynstr.2017.08.002), 2017-08-22
Supplement: mmc1.pdf [file mmc1.pdf]

| Supplementary Table 1 |                     |       |      |        |           |      |        |
|-----------------------|---------------------|-------|------|--------|-----------|------|--------|
| Tissue                | Gene                | Breed |      |        | Treatment |      |        |
|                       |                     | t     | P    | adj. P | t         | P    | adj. P |
| Hippocampus           | <i>EGR1</i>         |       |      |        | 4,61      | 0,00 | 0,00   |
|                       | <i>GR</i>           | 2,33  | 0,03 | 0,138  |           |      |        |
|                       | <i>AVP</i>          |       |      |        |           |      |        |
|                       | <i>AVPR1A</i>       |       |      |        |           |      |        |
|                       | <i>FKBP5</i>        |       |      |        | 3,20      | 0,00 | 0,02   |
|                       | <i>MR</i>           |       |      |        |           |      |        |
|                       | <i>BDNF</i>         |       |      |        |           |      |        |
|                       | <i>CRHR2</i>        |       |      |        |           |      |        |
|                       | <i>CRH</i>          |       |      |        |           |      |        |
|                       | <i>CRHR1</i>        | -3,44 | 0,00 | 0,018  |           |      |        |
| Hypothalamus          | <i>POMC hnRNA</i>   |       |      |        |           |      |        |
|                       | <i>AVP hnRNA</i>    |       |      |        |           |      |        |
|                       | <i>GR</i>           | 3,75  | 0,00 | 0,007  |           |      |        |
|                       | <i>AVP</i>          | 3,65  | 0,00 | 0,007  |           |      |        |
|                       | <i>FKBP5</i>        |       |      |        | 2,45      | 0,02 | 0,10   |
|                       | <i>AVPR1A</i>       |       |      |        |           |      |        |
|                       | <i>POMC</i>         |       |      |        |           |      |        |
|                       | <i>CRH</i>          |       |      |        |           |      |        |
|                       | <i>CRHR2</i>        |       |      |        |           |      |        |
|                       | <i>CRHR1</i>        | 3,43  | 0,00 | 0,009  |           |      |        |
|                       | <i>C-FOS</i>        |       |      |        | 5,10      | 0,00 | 0,00   |
|                       | <i>EGR1</i>         |       |      |        | 4,43      | 0,00 | 0,00   |
|                       | <i>TH</i>           |       |      |        |           |      |        |
| <i>BDNF</i>           |                     |       |      |        |           |      |        |
| Pituitary             | <i>AVPR1B</i>       |       |      |        | 2,06      | 0,05 | 0,12   |
|                       | <i>POMC hnRNA</i>   |       |      |        |           |      |        |
|                       | <i>GR</i>           |       |      |        |           |      |        |
|                       | <i>EGR1</i>         |       |      |        | -3,95     | 0,00 | 0,00   |
|                       | <i>C-FOS</i>        | 2,32  | 0,03 | 0,081  | -3,27     | 0,00 | 0,01   |
|                       | <i>AVPR1A</i>       |       |      |        |           |      |        |
|                       | <i>POMC</i>         | -3,85 | 0,00 | 0,007  |           |      |        |
|                       | <i>CRHR2</i>        | 2,25  | 0,03 | 0,081  |           |      |        |
|                       | <i>PC1</i>          | -3,47 | 0,00 | 0,008  |           |      |        |
|                       | <i>CRHR1</i>        |       |      |        | -4,62     | 0,00 | 0,00   |
| Adrenal gland         | <i>MRAP2</i>        |       |      |        | 2,85      | 0,01 | 0,02   |
|                       | <i>MRAP1</i>        |       |      |        | 2,57      | 0,02 | 0,03   |
|                       | <i>MC2R</i>         |       |      |        | 3,49      | 0,00 | 0,01   |
|                       | <i>STAR hnRNA</i>   |       |      |        | 2,16      | 0,04 | 0,06   |
|                       | <i>HSD3B2</i>       | -2,86 | 0,01 | 0,034  |           |      |        |
|                       | <i>FOSL2</i>        | -2,48 | 0,02 | 0,052  | 5,78      | 0,00 | 0,00   |
|                       | <i>CYP11A1</i>      | -4,61 | 0,00 | 0,001  |           |      |        |
|                       | <i>MC2R hnRNA</i>   |       |      |        | 2,32      | 0,03 | 0,05   |
|                       | <i>DBH</i>          |       |      |        |           |      |        |
|                       | <i>STAR</i>         |       |      |        | 4,67      | 0,00 | 0,00   |
|                       | <i>PNMT</i>         | 4,26  | 0,00 | 0,001  |           |      |        |
|                       | <i>TH</i>           | -2,47 | 0,02 | 0,052  | 3,49      | 0,00 | 0,01   |
|                       | <i>CYP11A hnRNA</i> | -2,27 | 0,03 | 0,067  |           |      |        |

Results from linear regression with gene expression as response variable and breed and treatment as fixed predictors (gene expression ~ breed + treatment). The acquired P-values were adjusted for the total number of tests within each tissue using false discovery rate (FDR).
